# Supplementary material for: Controllable hydrothermal synthesis of manganese dioxide nanostructures: shape evolution, growth mechanism and electrochemical properties
Source: Royal Society of Chemistry journal article supplement (doi:10.1039/c2ce06587h), 2012-01-01
Supplement: c2ce06587h.pdf [file c2ce06587h.pdf]

## Supporting Information

# Controllable Hydrothermal Synthesis of Manganese Dioxide Nanostructures: Shape Evolution, Growth Mechanism and Electrochemical Properties

Xiaochuan Duan, Jiaqin Yang, Haiyan Gao, Jianmin Ma, Lifang Jiao, and Wenjun Zheng\*

## Experimental Section

**Synthesis:** For investigation of the effect of  $K^+$  ions, different amount KCl was added the reaction system. In a typical synthesis procedure: 0.1 mmol of  $KMnO_4$  was put into 15 mL of deionized water under stirring to form a homogenous solution. Subsequently, a certain amount of KCl added into the total solution, and then the solution was transferred into a stainless-steel autoclave with a capacity of 20 mL, sealed and heated at the enactment temperature for 24 h. When the reaction was completed, the autoclave was cooled to room temperature naturally. The resultant product was collected and washed with deionized water, and anhydrous ethanol for several times until the solution was neutral. The final product was dried in a vacuum at 80 °C for 3 h. The synthetic conditions for preparing some typical samples are summarized in Table S1.

**Table S1.** Summary of the Experimental Parameters and Their Corresponding Morphologies of  $MnO_2$  Obtained under Different Conditions.

| Sample number | $KMnO_4$ [mmol] | KCl [mmol] | T [°C] | Phase    | Morphology      |
|---------------|-----------------|------------|--------|----------|-----------------|
| S'-1          | 0.1             | 0.1        | 180    | $\alpha$ | nanowire (main) |
| S'-2          | 0.1             | 0.9        | 180    | $\alpha$ | nanowire        |
| S'-3          | 0.1             | 1.0        | 180    | $\delta$ | nanowall (main) |
| S'-4          | 0.1             | 1.9        | 180    | $\delta$ | nanowall        |

## Results and Discussions

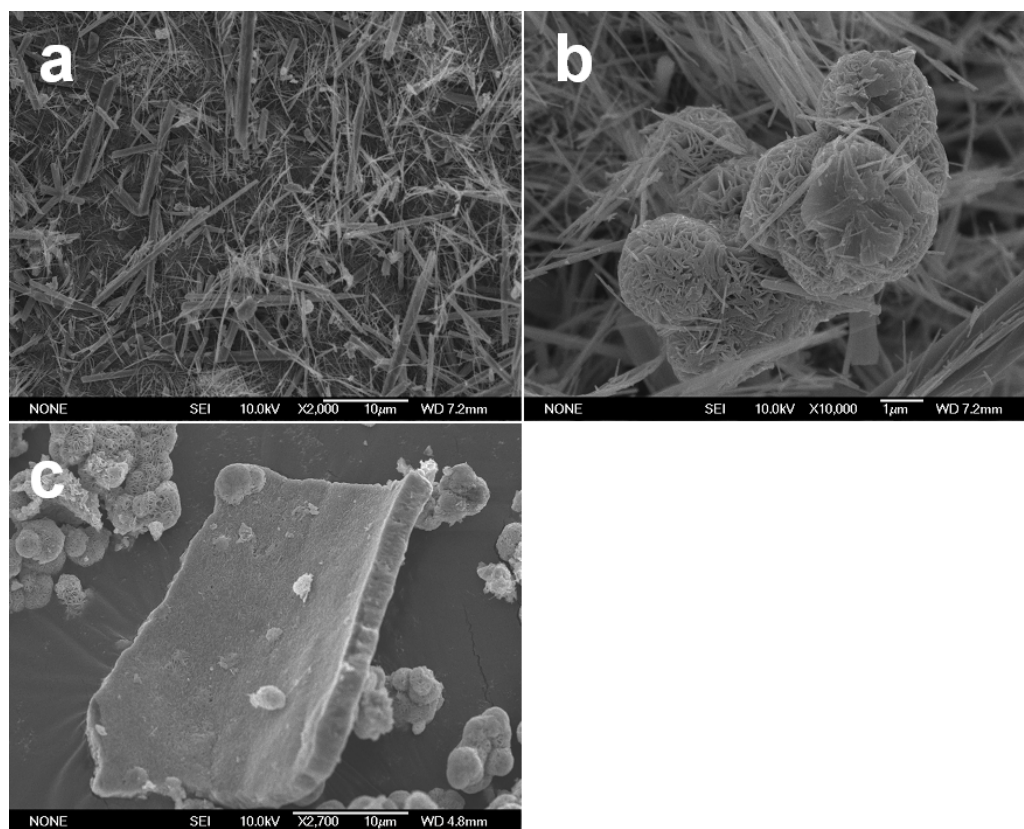

**Figure S1.** a), b) and c) SEM images of S-2, S-5 and S-7, respectively.

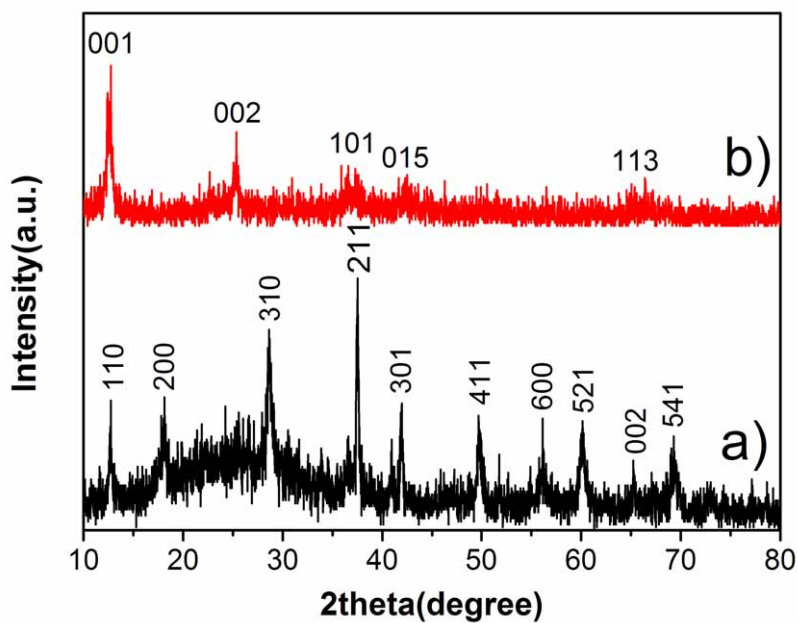

**Figure S2.** XRD patterns of as-prepared MnO<sub>2</sub>: (a) S-2, and (b) S-5, respectively.

It was unexpected that XRD did not detect the composition of the mixture, S-2 and S-5, which may be attributed to the sensitivity of XRD is not so high. It is well known that the material with content less than 5% cannot be detected by this method. So the  $\beta$ -MnO<sub>2</sub> in S-2 and  $\alpha$ -MnO<sub>2</sub> in S-5 were undetectable by XRD due to the low content and poor crystallinity. However, it is clearly can be seen the product consist of different types of MnO<sub>2</sub> investigated by SEM technique (Figure S1). In addition, it can estimate that the content of less phases do not exceed 5%.

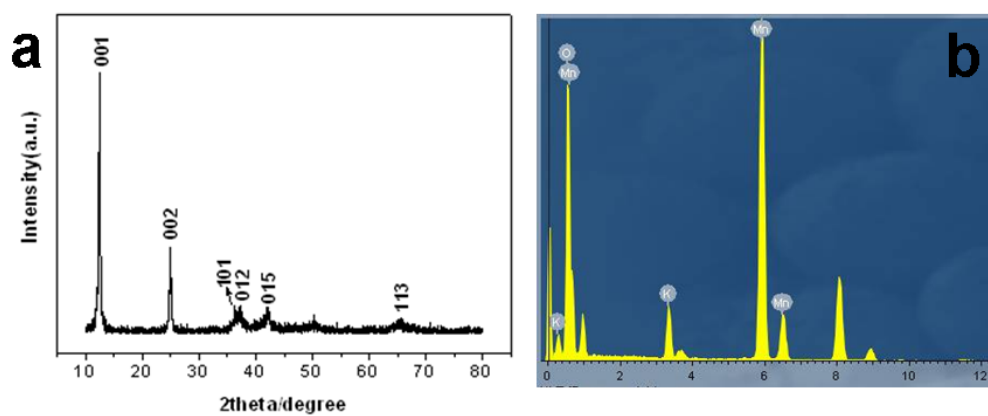

**Figure S3.** a) XRD pattern and b) EDS pattern of S-8,  $\delta$ -MnO<sub>2</sub> nanowall.

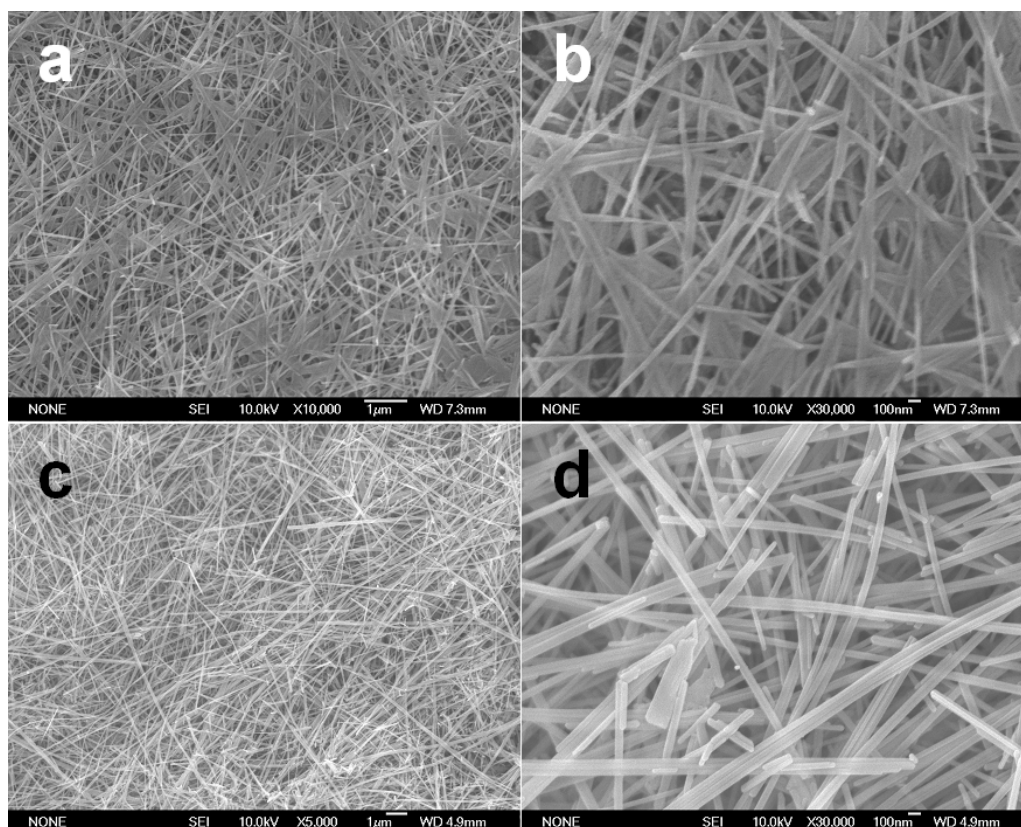

**Figure S4.** a), c) Low- and b), d) high-magnification SEM images of S-14 and S-15,  $\alpha$ -MnO<sub>2</sub> nanowires, respectively.

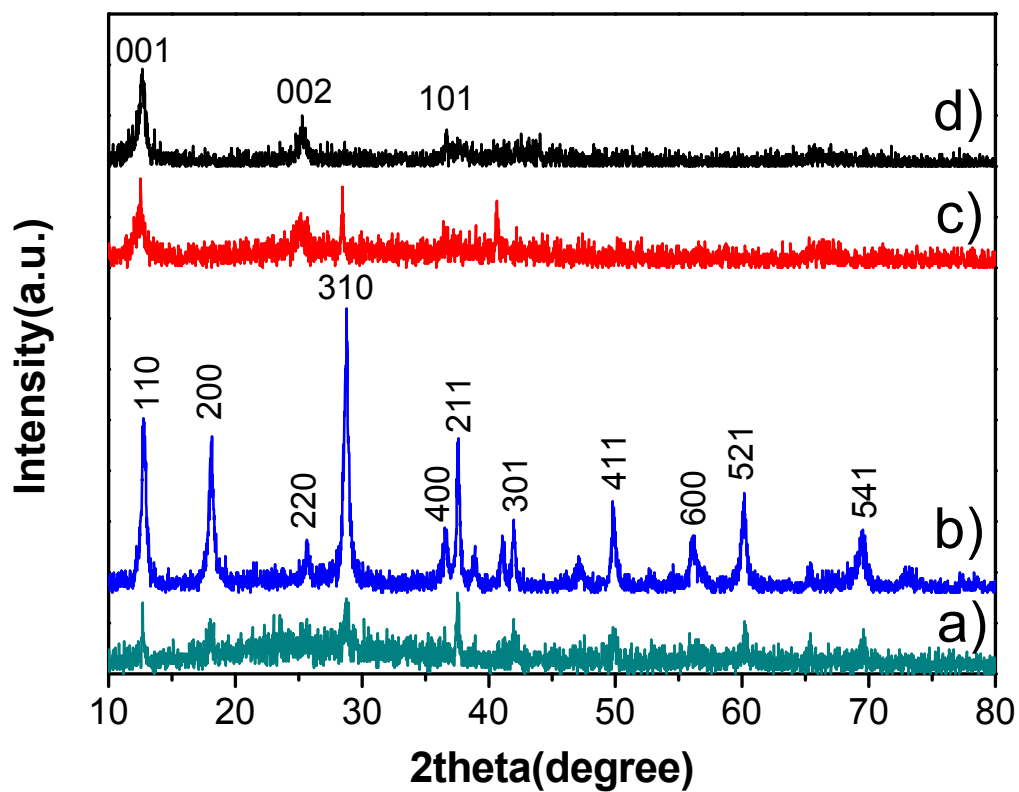

**Figure S5.** XRD patterns of as-prepared  $\text{MnO}_2$  with different amount of KCl: (a) S<sup>2</sup>-1, 0.1 mmol; (b) S<sup>2</sup>-2, 0.9 mmol; (c) S<sup>2</sup>-3, 1.0 mmol, and (d) S<sup>2</sup>-4, 1.9 mmol, respectively.

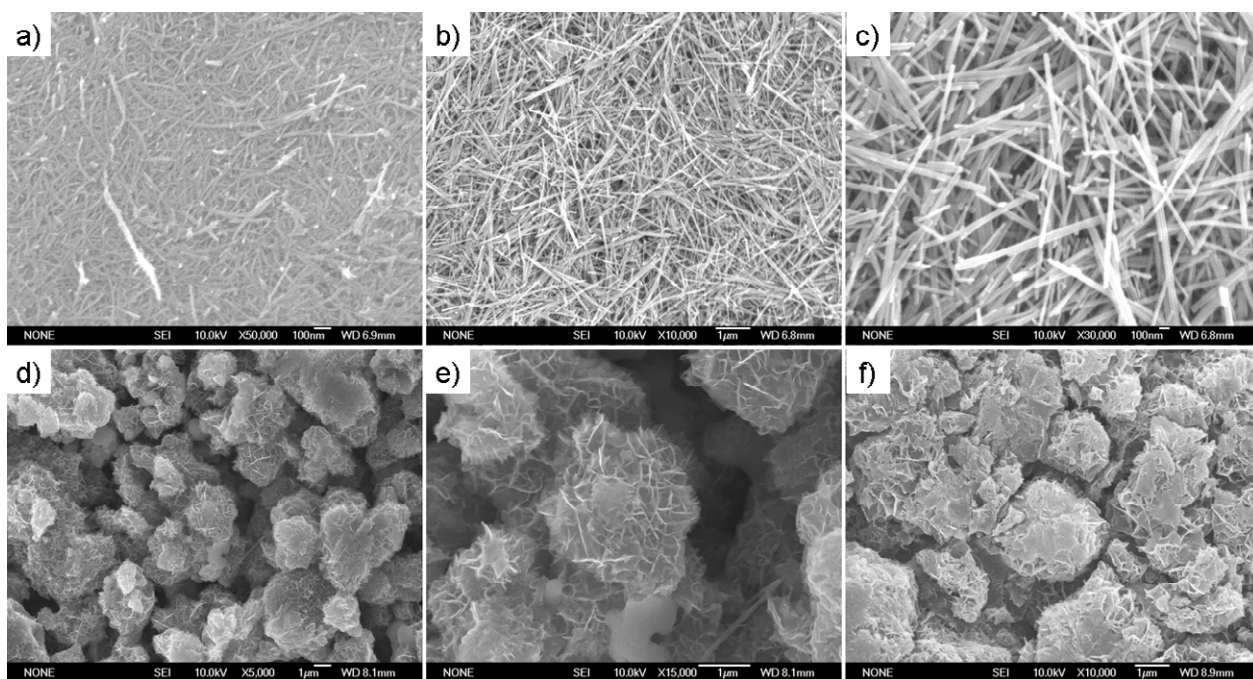

**Figure S6.** SEM images of as-prepared MnO<sub>2</sub> with different amount of KCl: (a) S'-1, (b and c) S'-2, (d and e) S'-3, and (f) S'-4, respectively.

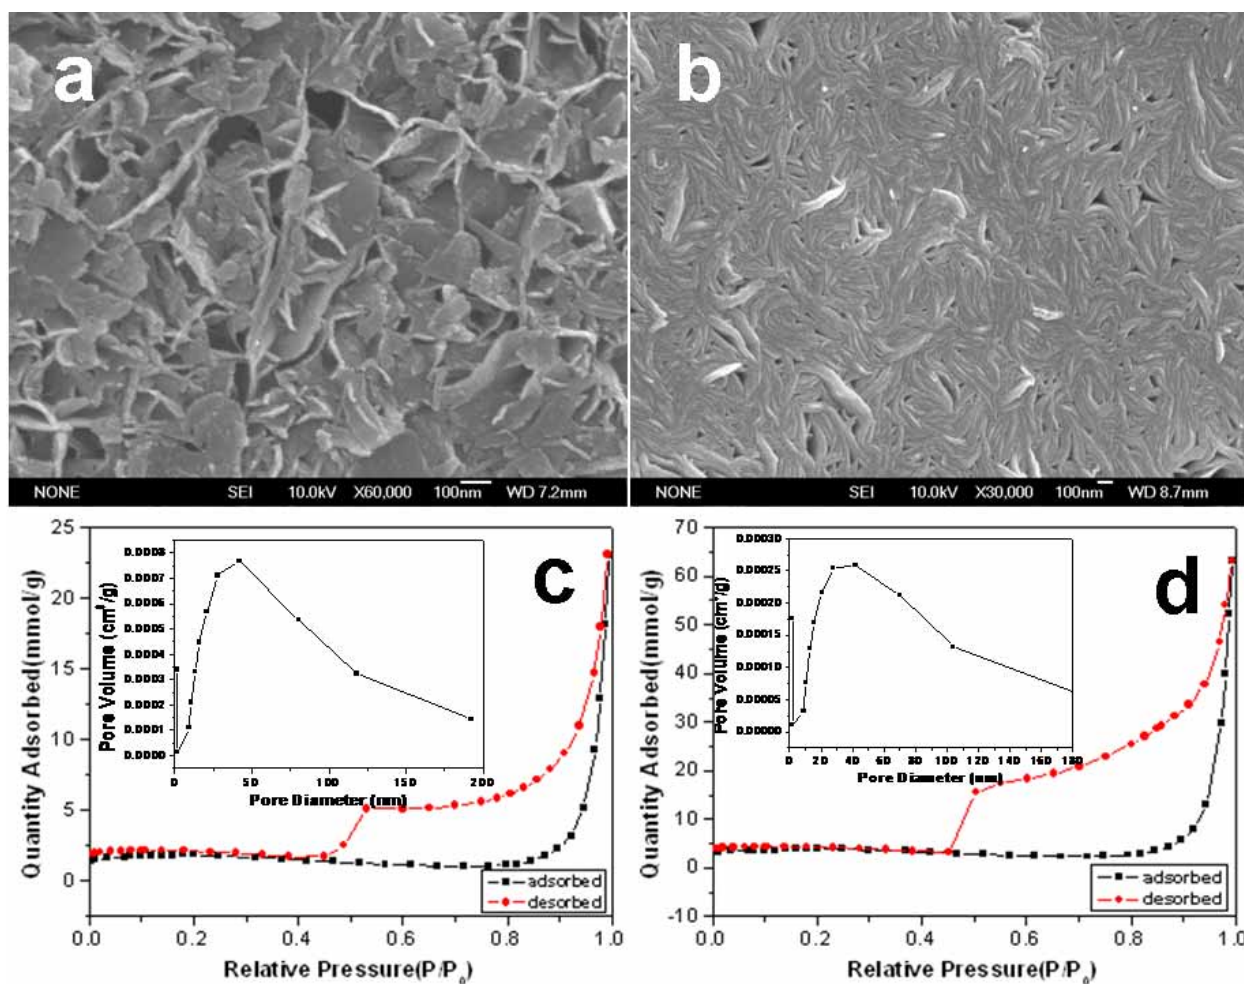

**Figure S7.** a) and b) SEM images of S-9,  $\delta$ -MnO<sub>2</sub> nanosheets and S-13,  $\delta$ -MnO<sub>2</sub> nanowall, respectively; c) and d) N<sub>2</sub> adsorption-desorption isotherm and pore-size distribution curves (inset) of S-9,  $\delta$ -MnO<sub>2</sub> nanosheet and S-13,  $\delta$ -MnO<sub>2</sub> nanowall, respectively.



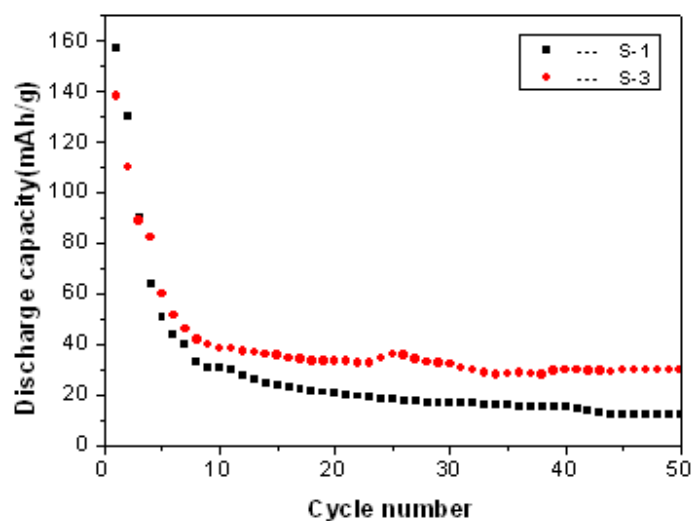

**Figure S8.** Discharge cycling performance of the electrode made from the as-prepared S-1,  $\beta$ - $\text{MnO}_2$  nanorods and S-3,  $\alpha$ - $\text{MnO}_2$  nanowires in the voltage range of 1.5–4.0 V vs.  $\text{Li/Li}^+$  at a current density of 50 mA/g. As can be clearly seen, the discharge capacity and cycling stability of as-prepared  $\beta$ - $\text{MnO}_2$  nanorods and  $\alpha$ - $\text{MnO}_2$  nanowires are very poor. In detail, the S-1 and S-3 had initial discharge capacities of 138 and 159 mAh/g, respectively. After 50 cycles, the discharge capacities were 17 and 36 mAh/g, respectively. These results may be attributed to the little specific surface area of as-prepared  $\beta$ - $\text{MnO}_2$  nanorods and  $\alpha$ - $\text{MnO}_2$  nanowires.
